RESEARCH ARTICLE

# Microbicidal effects of weakly acidified chlorous acid water against feline calicivirus and *Clostridium difficile* spores under protein-rich conditions

Hisataka Goda<sup>1</sup>, Hitoshi Yamaoka<sup>1,2</sup>, Haruyuki Nakayama-Imaohji<sup>2</sup>, Hiroyuki Kawata<sup>1</sup>, Isanori Horiuchi<sup>1</sup>, Yatsuka Fujita<sup>1</sup>, Tamiko Nagao<sup>3</sup>, Ayano Tada<sup>2</sup>, Atsushi Terada<sup>4</sup>, Tomomi Kuwahara<sup>2\*</sup>

**1** Honbu Sankei Co. Ltd., 2-2-53 Shiromi, Chuou-ku, Osaka, Japan, **2** Department of Microbiology, Faculty of Medicine, Kagawa University, 1750-1 Miki, Kagawa, Japan, **3** Faculty of Nursing, Shikoku University, Furukawa, Ojin-cho, Tokushima, Japan, **4** Department of Veterinary Medicine, Nihon University, Kameino, Fujisawa, Japan

\* [tomomi@med.kagawa-u.ac.jp](mailto:tomomi@med.kagawa-u.ac.jp)

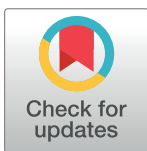

**OPEN ACCESS**

**Citation:** Goda H, Yamaoka H, Nakayama-Imaohji H, Kawata H, Horiuchi I, Fujita Y, et al. (2017) Microbicidal effects of weakly acidified chlorous acid water against feline calicivirus and *Clostridium difficile* spores under protein-rich conditions. PLoS ONE 12(5): e0176718. <https://doi.org/10.1371/journal.pone.0176718>

**Editor:** Vijai Gupta, Tallinn University of Technology, ESTONIA

**Received:** December 5, 2016

**Accepted:** April 15, 2017

**Published:** May 4, 2017

**Copyright:** © 2017 Goda et al. This is an open access article distributed under the terms of the [Creative Commons Attribution License](https://creativecommons.org/licenses/by/4.0/), which permits unrestricted use, distribution, and reproduction in any medium, provided the original author and source are credited.

**Data Availability Statement:** All relevant data are within the paper.

**Funding:** This study was supported by the collaboration research fund between Kagawa University and Honbu Sankei Co. Ltd. The study design, data collection and analysis, decision to publish or preparation of the manuscript was done under discussion between Kagawa University and Honbu Sankei Co. Ltd.

## Abstract

Sanitation of environmental surfaces with chlorine based-disinfectants is a principal measure to control outbreaks of norovirus or *Clostridium difficile*. The microbicidal activity of chlorine-based disinfectants depends on the free available chlorine (FAC), but their oxidative potential is rapidly eliminated by organic matter. In this study, the microbicidal activities of weakly acidified chlorous acid water (WACAW) and sodium hypochlorite solution (NaClO) against feline calicivirus (FCV) and *C. difficile* spores were compared in protein-rich conditions. WACAW inactivated FCV and *C. difficile* spores better than NaClO under all experimental conditions used in this study. WACAW above 100 ppm FAC decreased FCV >4 log<sub>10</sub> within 30 sec in the presence of 0.5% each of bovine serum albumin (BSA), polypeptone or meat extract. Even in the presence of 5% BSA, WACAW at 600 ppm FAC reduced FCV >4 log<sub>10</sub> within 30 sec. Polypeptone inhibited the virucidal activity of WACAW against FCV more so than BSA or meat extract. WACAW at 200 ppm FAC decreased *C. difficile* spores >3 log<sub>10</sub> within 1 min in the presence of 0.5% polypeptone. The microbicidal activity of NaClO was extensively diminished in the presence of organic matter. WACAW recovered its FAC to the initial level after partial neutralization by sodium thiosulfate, while no restoration of the FAC was observed in NaClO. These results indicate that WACAW is relatively stable under organic matter-rich conditions and therefore may be useful for treating environmental surfaces contaminated by human excretions.

## Introduction

Excretions from symptomatic or asymptomatic carriers of pathogens are the major sources of infectious diseases [1, 2]. Environmental surfaces contaminated by these excretions are often involved in outbreaks of norovirus and multi-drug resistant microorganisms [3–5]. Therefore,

**Competing interests:** This study was supported by collaboration research fund between Kagawa University and Honbu Sankei Co. Ltd. We declare that this does not alter our adherence to PLOS ONE policies on sharing data and materials.

routine cleaning and disinfection of environmental surfaces as well as hand washing of workers in healthcare facilities or food plants is an important measure to block pathogen transmission [6–12]. In particular, facilities and plants, including seats and toilets, shared with a number of people should be adequately sanitized to prevent transmission of pathogens [13, 14].

Additionally, healthcare workers are often required to rapidly and accurately disinfect environmental surfaces contaminated by human excretions such as sudden vomit in norovirus gastroenteritis or recurring diarrhea in *Clostridium difficile* infection. Because these microorganisms are resistant to commonly and routinely used disinfectants such as quaternary ammonium and alcohol-based antiseptics [3], healthcare workers face difficulties in choosing the appropriate sanitizer. Restaurants and food factories, where norovirus food poisoning occurs frequently, face a similar situation.

Chlorine is a key agent in inactivating non-enveloped viruses and spore-forming bacteria [15, 16]. Authorized guidelines recommend the disinfection of environmental surfaces contaminated by norovirus and *C. difficile* with high concentrations of sodium hypochlorite (NaClO) [15, 16]. The microbicidal mechanism of chlorine is oxidative damage to the functional molecules in microorganisms such as DNA or proteins [17–19]. Therefore, the microbicidal effects of chlorine-based sanitizers are dependent on their oxidative potential. The oxidative potential of chlorine is determined by free available chlorine (FAC), which indicates the level of reactive chlorine contributing to oxidation [20, 21], while the total chlorine (TC) level measured by iodometric titration methods [22] indicates all of the chlorine, including the less reactive combined chlorine. In the case of NaClO, total chlorine is equivalent to FAC because all of the chlorine ( $\text{HClO}$ ,  $\text{ClO}^-$ ) is involved in nucleophilic reactions.

Chlorous acid ( $\text{HClO}_2$ )-based sanitizers such as acidified sodium chlorite solution (ASC) and weakly acidified chlorous acid water (WACAW) have been applied to food and environmental sanitation [23–26].  $\text{HClO}_2$ -based sanitizers have been reported to be more stable than NaClO under organic-matter-rich conditions [24, 26, 27]. They contain various forms of chlorinated oxides such as  $\text{HClO}_2$ , dissolved  $\text{ClO}_2$  and  $\text{ClO}_2^-$ , and the former two are responsible for most of the microbicidal activity of WACAW. The predominant species in chlorous acid solutions above pH 4.0 (as in WACAW, pH 5.0–6.0) are  $\text{ClO}_2^-$  and  $\text{HClO}_2$  [28]. Of these,  $\text{HClO}_2$  plays a major role in microbial killing of WACAW since oxidizing potential of  $\text{ClO}_2^-$  is much weaker than  $\text{HClO}_2$  or  $\text{ClO}_2$  [29]. Total chlorine (TC) level of WACAW is much higher than FAC level, indicating that  $\text{ClO}_2^-$  is a major chlorinated oxide species in this sanitizer before use.

In general, the microbicidal effect of chlorine-based sanitizer is assessed by FAC, not TC, level. Therefore, the FAC levels of the test chlorine solutions should be adjusted in comparative studies on microbicidal effects or stability. *N,N*-diethyl-*p*-phenylenediamine sulfate (DPD) is usually utilized to monitor the FAC level of chlorine solution because this indicator is less oxidized by combined chlorine [30].

In this study, the microbicidal activities of WACAW and NaClO at various FAC levels were compared in protein-rich solutions containing human norovirus surrogate, feline calicivirus (FCV) or *C. difficile* spores in order to simulate the disinfection of human excretions containing these important nosocomial pathogens.

## Materials and methods

### Chemicals

The sanitizers used in this study were chlorous acid water (Honbusankei Co., Ltd.) and NaClO (Nankai Chemical Co., Ltd.). Sodium thiosulfate, sodium chlorite,  $\text{KH}_2\text{PO}_4$ ,  $\text{K}_2\text{HPO}_4$ , NaOH,

*N,N*-diethyl-*p*-phenylenediamine (DPD) and sodium sulfate were purchased from Wako Pure Chemical Industries, Ltd. 3,3',5,5'-tetramethylbenzidine (TMB) was purchased from Tokyo Chemical Industry Co. Ltd. BSA (35% in PBS), polypeptone and meat extract were purchased from Sigma, Sumitomo Dainippon Pharma Co., Ltd. and Nacalai Tesque Inc., respectively. BSA, polypeptone and meat extract were added to microbicidal assays as an organic matter load.

### Measurement of TC

The TC levels of NaClO and WACAW were measured by an iodometric titration method [22]. The test solutions were diluted 10-fold with ion-exchanged water and mixed with 10% (w/w) potassium iodine and 10% (w/w) sulfate. After 15 min at room temperature in the dark, 0.1 M sodium thiosulfate solution was added until the color of the mixture turned light yellow. After starch solution (1%, w/w) was added, the mixtures were titrated with 0.1 M sodium thiosulfate solution until they became clear. The total chlorine (R) was calculated using the following equation with the weight of added sodium thiosulfate (A), factor of sodium thiosulfate (F), weight of sample used (W) and dilution rate of sample (K):

$$R = (A \times F/W) \times 0.0035 \times 100 \times K \times 10,000$$

### Measurement of FAC levels

The FAC levels (1–5,000 ppm (w/v)) of WACAW or NaClO were adjusted using the DPD method. One gram of ground DPD was mixed with 24 g sodium sulfate anhydrate, which was used as an indicator. After the test sample (9.5 ml) was buffered with 0.5 ml of 0.2 M  $\text{KH}_2\text{PO}_4$  (pH 6.5), 0.1 g of DPD including sodium sulfate anhydrate was added, and the absorbance at 510 nm was measured. FAC levels of WACAW were calculated from standard curves generated with NaClO. The FAC levels of the test sanitizers after contact with organic substances were monitored by TMB method as previously described [27]. Combined chlorine level was calculated by subtracting FAC from TC.

### Preparation of sanitizers

ASC was prepared by acidifying the sodium chlorite solution of 2,400 ppm TC to pH 2.3 with 0.1 M HCl. WACAW was prepared by adjusting the pH of chlorous acid water to 6.0 with phosphate buffer (pH5.0). According to the Notification No.15 from the Ministry of Health, Labor, and Welfare Japan [31], chlorous acid water is defined as a solution produced by the following procedure. Saturated NaCl solution was acidified by HCl and electrolyzed in diaphragmless apparatus. The solution is strongly acidified with sulfuric acid to produce chloric acid ( $\text{HClO}_3$ ). Chlorous acid water (containing 40,000–60,000 ppm  $\text{HClO}_2$ ) is produced by treating the chloric acid solution with hydrogen peroxide. WACAW and NaClO were diluted with deionized water to adjust to the setting chlorine levels. The pH of each preparation was monitored with pH meter (LAQUAtwin B-72, Horiba Ltd., Japan).

### Spectrophotometric pattern analysis of WACAW and ASC

Chemical composition of WACAW and ASC was compared by spectrophotometric analysis. The FAC level of WACAW and ASC was diluted to 2,400 ppm with deionized water. After the WACAW and ASC were further diluted at 100- and 10-fold with deionized water, these reagents were kept in the dark at 15°C, and the absorbance (200–400 nm) was measured periodically until 7 days after preparation using a spectrophotometer (Hitachi U-5100).

## Plaque assay

The virucidal activity of WACAW and NaClO was evaluated using FCV F9 strain obtained from the ATCC. The FCV was amplified by infecting confluent Crandell Rees feline kidney (CRFK) cell monolayers cultured in a T75 flask in Dulbecco's minimal essential medium (DMEM) supplemented with 10% FBS. When most of the cells detached from the flask, the supernatant was collected, centrifuged to remove cell debris and divided into aliquots that were stored at  $-80^{\circ}\text{C}$  until use as a viral inoculum. The stock FCV viral titer was  $2.0 \times 10^7$  plaque-forming units (PFU)  $\text{ml}^{-1}$ .

Antiviral activities of the test sanitizers towards FCV were assessed by a standard plaque assay. BSA, polypeptone, meat extract or yeast extract are listed as organic matter for a viral load examination in the guideline for examination of food hygiene in Japan [32]. To evaluate the effect of organic substances on the virucidal efficiency of the test sanitizers, a viral inoculum (FCV titer:  $2.0 \times 10^6$  PFU  $\text{ml}^{-1}$ ) containing BSA (5.0%, w/v), polypeptone (5.0%, w/v) or meat extract (5.0%, w/v) was prepared. The viral inoculum (0.1 ml) was mixed with 0.9 ml saline or test sanitizers. To examine the effect of higher concentration of BSA (5.0% w/v of final concentration), a viral inoculum (FCV titer:  $2.0 \times 10^6$  PFU  $\text{ml}^{-1}$ ) containing 10% BSA (w/v) (0.5 ml) was mixed with an equal amount (0.5 ml) of the test sanitizers, which were adjusted at 2-fold higher FAC to the setting. The mixtures were incubated at  $25^{\circ}\text{C}$  in block incubator (BI-515, ASTEC Co. Ltd., Japan) for 0.5, 1, 3, 5, and 10 min before samples (0.1 ml) were collected and neutralized with 0.9 ml 0.1 M sodium thiosulfate in 0.6 M Tris-HCl (pH 7.0). The neutralized solutions (0.5 ml each) were poured onto a CRFK confluent culture monolayer (grown in 60 mm dishes containing DMEM plus 10% FBS (w/v), 100 U penicillin  $\text{ml}^{-1}$  and 100  $\mu\text{g ml}^{-1}$  streptomycin, washed with PBS before treatment) and rocked for 1 h in a  $\text{CO}_2$  incubator. After removing the viral solution, the cells were overlaid with 0.5% methylcellulose (w/v) in minimum essential media plus 0.5% FBS (w/v). The treated cells were incubated in a  $\text{CO}_2$  incubator at  $37^{\circ}\text{C}$  with 5%  $\text{CO}_2$  (v/v). After 48 h, the cells were fixed and stained with 0.05% crystal violet (w/v) in a 10% formaldehyde solution (w/v) for 4 h, then washed vigorously with tap water. The clear plaques were enumerated and the PFU/ml of the surviving FCV was calculated.

## Preparation of *C. difficile* spores

*C. difficile* strain 630 was used in this study. A glycerol stock of the strain was streaked onto a brain-heart infusion with yeast extract and L-cysteine (BHIS) agar plate and anaerobically incubated at  $37^{\circ}\text{C}$  for 72 h in an anaerobic chamber (Forma Scientific) conditioned with mixed gas ( $\text{N}_2$ , 80%;  $\text{H}_2$ , 10%;  $\text{CO}_2$ , 10%, v/v). A single colony was inoculated into 200 ml Gifu anaerobic broth (GAM, Nissui Pharmaceutical Co. Ltd.) and anaerobically incubated at  $37^{\circ}\text{C}$  for 1 week. After spore formation was confirmed by staining with malachite green, the culture was centrifuged at 6,000 rpm for 15 min at  $4^{\circ}\text{C}$ . The pellet was suspended in 5 ml of PBS (pH 7.4), and the suspension was heated at  $60^{\circ}\text{C}$  for 20 min. The spores were collected by centrifugation at 12,000 rpm for 5 min at  $4^{\circ}\text{C}$  and washed three times with 4 ml of sterile distilled water. Spores were finally suspended in 2 ml of saline containing 0.05% Tween 20 and dispersed by brief sonication. Viable spore numbers were determined by plating the dilution of the spore solution with saline containing 0.05% Tween 20 (w/v) on BHIS agar containing the *C. difficile* spore germinant taurocholic acid (TCA). The spore suspension was divided into aliquots and stored at  $-80^{\circ}\text{C}$  until use. The stock *C. difficile* spore titer was  $1.2 \times 10^6$  colony-forming units (CFU)  $\text{ml}^{-1}$ .

## Sporicidal assay

The sporicidal activities of WACAW and NaClO against *C. difficile* 630 spores were compared with or without 0.5% polypeptone (w/v). In assays with polypeptone, polypeptone was added

to the spore solution to 5% (w/v) before treatment with the test sanitizers. The spore solution (0.1 ml) was mixed with 0.9 ml of WACAW or NaClO with FAC adjusted to 50, 100 or 200 ppm. The mixture was kept at 25°C in an anaerobic chamber, and 0.1 ml was sampled at 1, 5, and 10 min after incubation. These samples were immediately neutralized with 0.1 M sodium thiosulfate and serially diluted with saline containing 0.05% Tween 20 (w/v). The appropriate dilutions were plated onto BHIS agar containing 0.1% TCA (w/v). After the plates were anaerobically incubated at 37°C for 72 h, the number of colonies was counted.

### Microbicidal assay against FCV and *C. difficile* spores in rat feces

The cecal contents of two male germ-free WA/Jic rats (12 weeks old, Clea Japan Inc.) were aseptically collected and stocked at -80°C until use. The cecal contents were weighted and suspended in PBS (pH 7.4) to 10% (w/v). The inoculum was prepared by mixing the FCV or *C. difficile* spore stock solution with 10% rat cecal suspension at 1:1. The inoculum (0.1 ml), which included 5.0% (w/v) rat cecal content, was added to the 0.9 ml of test sanitizer (WACAW or NaClO); the final concentration of rat cecal content in the reaction mixture was 0.5% (w/v). The surviving FCV or *C. difficile* spore after 1-min exposure to the test sanitizer was enumerated as described above.

### Monitoring of FAC after partial neutralization with sodium thiosulfate

According to the following chemical equations (upper and lower equation for NaClO and WACAW, respectively), an 8-fold amount of sodium thiosulfate is needed to neutralize WACAW compared with NaClO.

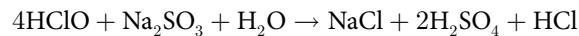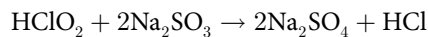

Therefore, 1 ml of WACAW (pH6.5) and NaClO (pH10.3) with 1, 200–1,300 ppm FAC was partially neutralized with 336 µl and 42 µl of 0.1 M sodium thiosulfate, respectively. These solutions were kept at 4°C, and their FAC levels were monitored by the DPD method upon periodical sampling.

### Statistical analysis

Data were expressed as mean ± standard deviation. Statistical analysis of the data was performed with StatFlex ver. 6.0 (Artech Co., Ltd., Tokyo) using analysis of variance (ANOVA) followed by Dunnett's test. Data were considered to be significantly different if the *p* value was less than 0.05.

### Ethics

Animal experiment was carried out in accordance with Japanese legislation and guidelines under the jurisdiction of the Ministry of Education, Culture, Sports, Science and Technology, Japan. The protocols of animal experiments were approved by the committee of animal experiment of the Kagawa University (Approved Number;16666–1). Animal care, housing, feeding, sampling, observation, and environmental enrichment were performed in accordance with the guidelines.

## Results

### Characterization of WACAW and ASC by spectrophotometric analysis

Both WACAW and ASC contained various chlorous compounds such as  $\text{ClO}_2$ ,  $\text{ClO}_2^-$ , and  $\text{HClO}_2$ .  $\text{ClO}_2^-$  and  $\text{ClO}_2$  show maximum absorbance at around 260 nm and 360 nm, respectively. As shown in Fig 1, spectrophotometric patterns were similar between ASC and WACAW immediately after preparation (day 0). However, in the case of ASC, the peak at 260 nm decreased and the 360 nm peak showing  $\text{ClO}_2$  increased periodically (Fig 1A). In contrast,

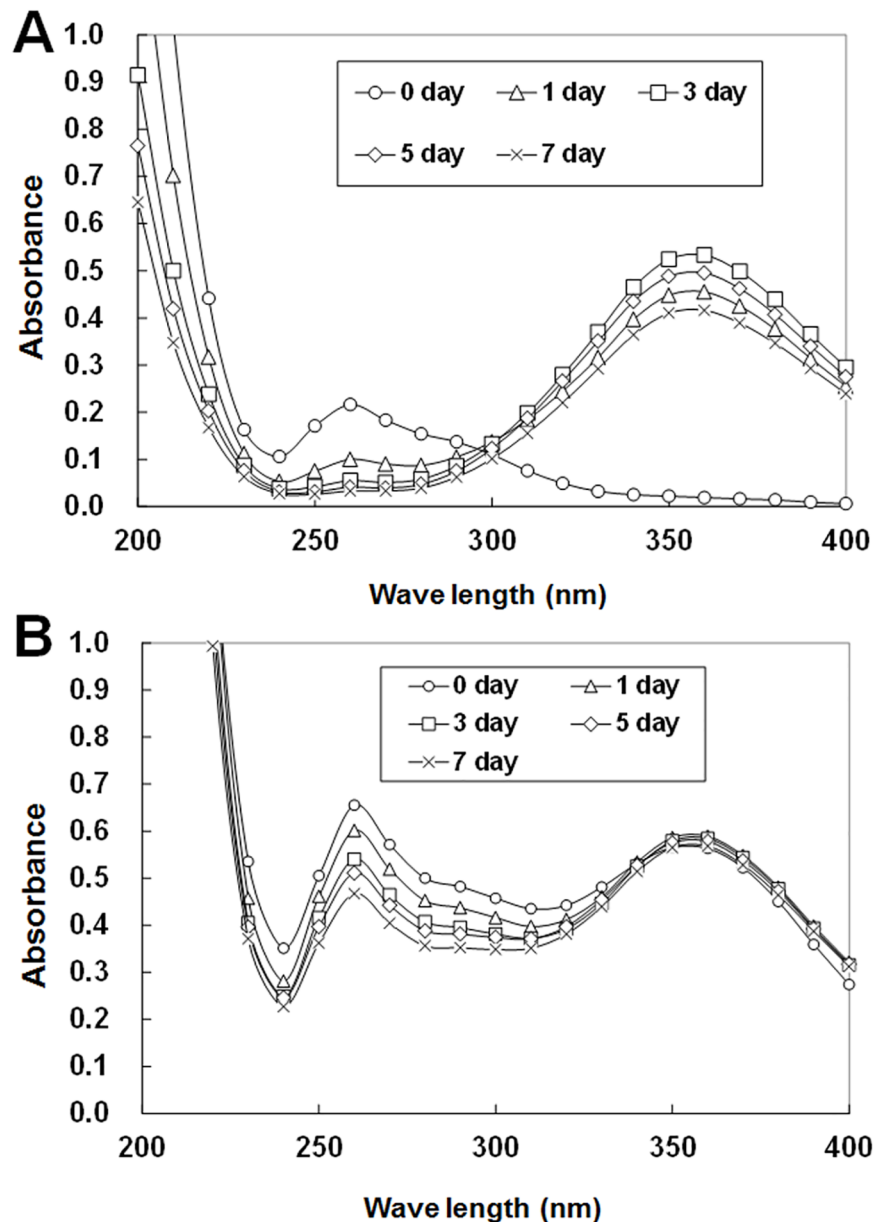

**Fig 1. Spectrophotometric characterizations of ASC (A) and WACAW (B).** Spectra were measured at the indicated day after preparation. The peaks around 260 nm and 360 nm indicate  $\text{ClO}_2^-$  and  $\text{ClO}_2$ , respectively. ASC and WACAW were diluted with distilled water at 10- and 100-fold for the absorbance to be within the measurable range.

<https://doi.org/10.1371/journal.pone.0176718.g001>

the spectrophotometric pattern of WACAW was similar to that on day 0 even 7 days after preparation, indicating that the chemical composition of WACAW is more stable (Fig 1B).

### FCV inactivation by WACAW and NaClO in the presence and absence of BSA

The inactivation of FCV by WACAW and NaClO was tested via plaque assay. In the absence of BSA, WACAW at 5 ppm FAC and NaClO at 50 ppm FAC decreased FCV over 4 log<sub>10</sub> (Fig 2A). In the presence of 0.5% BSA (w/v), NaClO at 200 ppm FAC showed less virucidal activity and achieved only 1 log<sub>10</sub> decrease even after a 5 min treatment (Fig 2B). NaClO at 1,000 ppm FAC was needed to achieve a >5 log<sub>10</sub> FCV decrease within 30 sec. In contrast, WACAW achieved a >5 log<sub>10</sub> decrease in FCV at 50 ppm FAC within 30 sec even in the presence of 0.5% BSA (w/v). In the presence of 5.0% BSA (w/v), NaClO at 3,000 ppm FAC only decreased 1 log<sub>10</sub> FCV even after 5 minutes of treatment, and NaClO at 5,000 ppm FAC was needed to decrease >5 log<sub>10</sub> FCV within 30 sec (Fig 2C). In the case of WACAW, 200 ppm FAC was not sufficient for FCV inactivation, but WACAW at 400 ppm FAC reduced FCV more than 4 log<sub>10</sub> within 3 min. In addition, WACAW at 600 ppm FAC reduced >5 log<sub>10</sub> FCV within 30 sec. These data indicate that WACAW is more effective for FCV inactivation than NaClO in the presence of BSA.

### FCV inactivation by WACAW and NaClO in the presence of polypeptone

Polypeptone (0.5%, w/v) was used to increase the protein load in the FCV inactivation assay. As shown in Fig 3, polypeptone interfered with the virucidal activity of WACAW and NaClO against FCV to a greater extent than BSA. NaClO at 1,000 ppm FAC resulted in a 4 log<sub>10</sub> FCV decrease with the 3-min treatment, and 3,000 ppm FAC in NaClO inactivated >5 log<sub>10</sub> FCV within 30 sec. In the case of WACAW, the FAC level required to decrease >5 log<sub>10</sub> FCV within 30 sec was 200 ppm.

### FCV inactivation by WACAW and NaClO in the presence of meat extract

Meat extract (0.5%, w/v) was also tested to increase the protein load in the FCV inactivation assay. Interestingly, meat extract affected the virucidal activity of NaClO to a greater extent than polypeptone, while the effect of the meat extract on the virucidal activity of WACAW was weaker than polypeptone. As shown in Fig 4, NaClO at 1,000 ppm FAC achieved less than a 3 log<sub>10</sub> FCV decrease even after 5-min treatment. As with 0.5% polypeptone (w/v), NaClO at 3,000 ppm FAC was needed to reduce >5 log<sub>10</sub> FCV within 30 sec. Although WACAW at 50 ppm FAC did not show virucidal activity (only 1 log<sub>10</sub> FCV decrease), WACAW at 100 ppm and 200 ppm FAC achieved >5 log<sub>10</sub> FCV decrease within the 30-sec treatment.

### *C. difficile* spore inactivation by WACAW and NaClO

The sporicidal activity of WACAW against *C. difficile* 630 spores was examined. In the absence of additional protein, WACAW at 50, 100, and 200 ppm FAC inactivated >3.5 log<sub>10</sub> *C. difficile* spores within 1 min, and NaClO at 200 ppm FAC showed equivalent sporicidal activity (Fig 5A). However, in the presence of 0.5% polypeptone (w/v), no sporicidal activity on *C. difficile* spores was observed with NaClO at 200 ppm FAC whereas WACAW at 200 ppm FAC decreased >3.5 log<sub>10</sub> *C. difficile* spores within 1 min under the same conditions (Fig 5B). WACAW at 100 ppm FAC also showed weak sporicidal activity (1.51–1.77 log<sub>10</sub> CFU decrease) on *C. difficile* spores in the presence of 0.5% polypeptone (w/v).

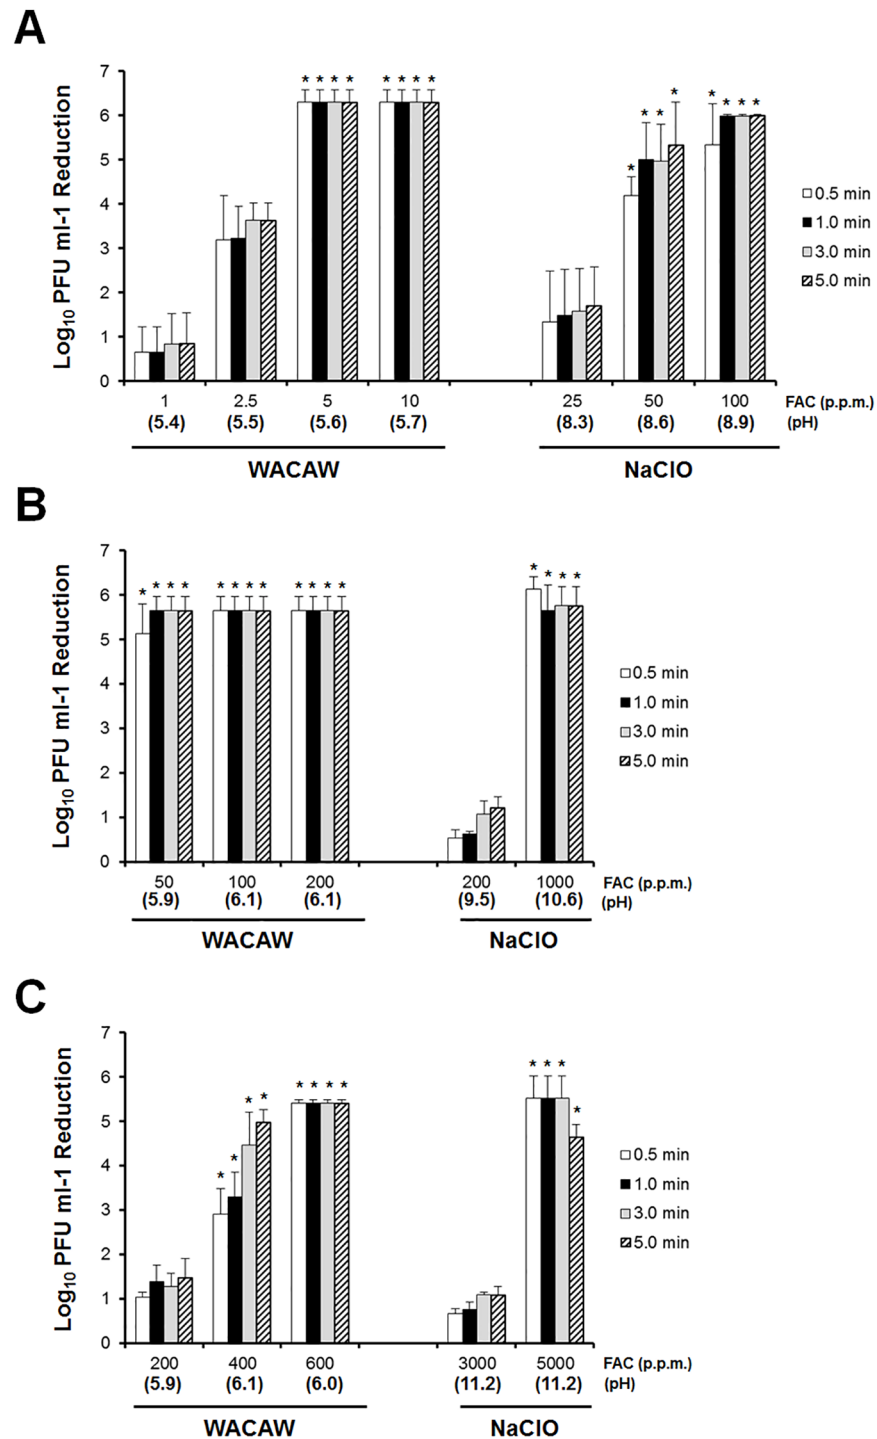

**Fig 2. Effect of BSA on FCV inactivation by WACAW and NaClO.** The virucidal activity against FCV F9 was examined without BSA (A) or with 0.5% (w/v) BSA (B) or 5.0% (w/v) BSA (C). The remaining FCV infectivity after treatment with the test sanitizers for the indicated times was quantified by plaque assay. Data are expressed as means  $\pm$  standard deviations obtained from three independent experiments. \* Significantly different from the data in NaClO with 25 ppm (A), 200 ppm (B) and 3,000 ppm (C) at each time point ( $p < 0.01$ ).

<https://doi.org/10.1371/journal.pone.0176718.g002>



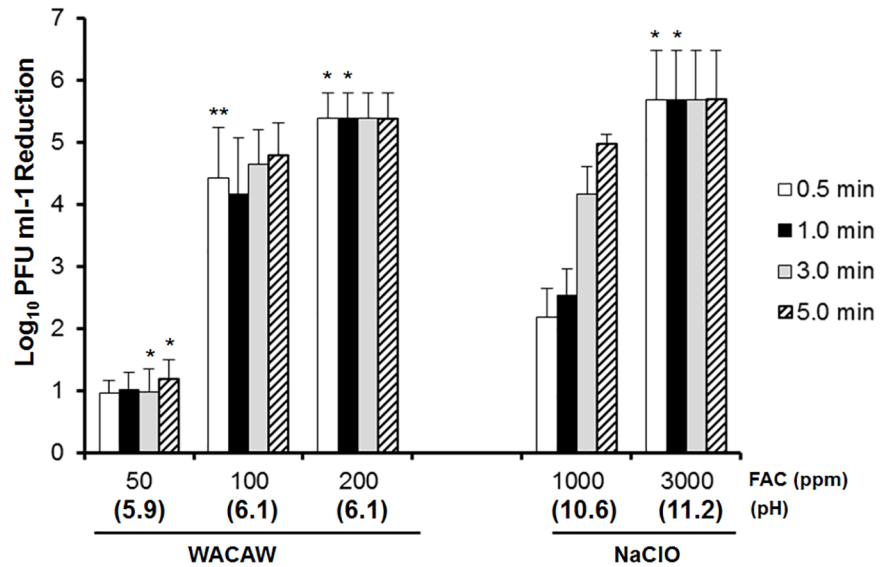

**Fig 3. Effect of polypeptone on FCV inactivation by WACAW and NaClO.** The virucidal activity against FCV F9 was examined in reaction mixtures containing 0.5% polypeptone (w/v). The remaining FCV infectivity after treatment with the test sanitizers for the indicated times was quantified by plaque assay. Data are expressed as means ± standard deviations obtained from three independent experiments. Significant difference from the 1,000 ppm NaClO at each time point was expressed by \* ( $p < 0.01$ ) or \*\* ( $p < 0.05$ ).

<https://doi.org/10.1371/journal.pone.0176718.g003>

### Inactivation of FCV and *C. difficile* spore in rat cecal content

Fecal-oral route plays an important role in the human to human transmission of norovirus and *C. difficile* spores. To simulate the disinfection in practical condition, rat cecal content was

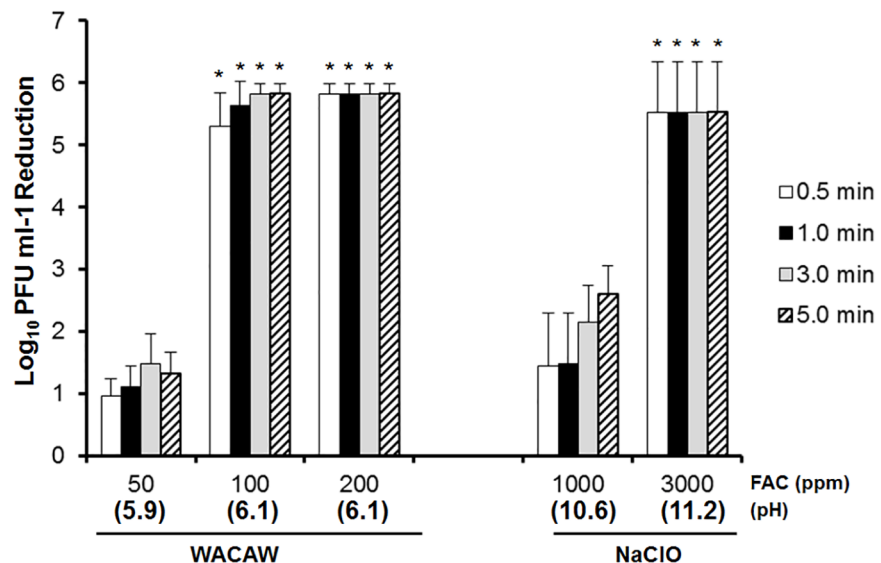

**Fig 4. Effect of meat extract on FCV inactivation by WACAW and NaClO.** The virucidal activity against FCV F9 was examined in reaction mixtures containing 0.5% meat extract (w/v). The remaining FCV infectivity after treatment with the test sanitizers for the indicated times was quantified by plaque assay. Data are expressed as means ± standard deviations obtained from three independent experiments. Significant differences from the 1,000 ppm NaClO at each time point were expressed by \* ( $p < 0.01$ ).

<https://doi.org/10.1371/journal.pone.0176718.g004>

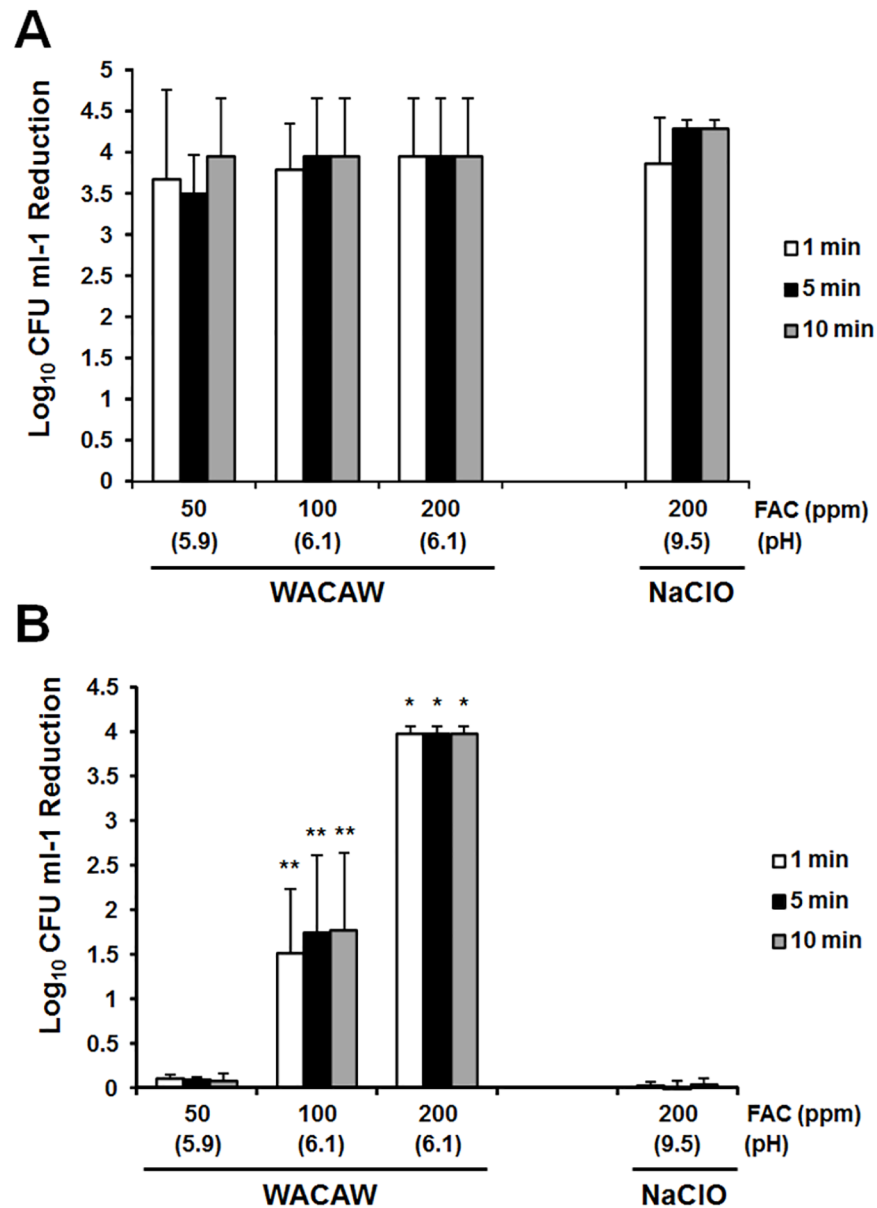

**Fig 5. *C. difficile* spore inactivation by WACAW and NaClO.** The sporicidal activity against *C. difficile* 630 spores was examined in reaction mixtures without (A) or with 0.5% (w/v) polypeptone (B). The remaining viable *C. difficile* spores after treatment with the test sanitizers for the indicated times were quantified using a standard plate assay with BHIS supplemented with taurocholic acid. Data are expressed as means  $\pm$  standard deviations obtained from three independent experiments. Significant differences from the 200 ppm NaClO at each time point were expressed by \* ( $p < 0.01$ ) or \*\* ( $p < 0.05$ ).

<https://doi.org/10.1371/journal.pone.0176718.g005>

used as an organic matter load. As shown in Fig 6, 200 ppm and 400 ppm WACAW inactivated FCV and *C. difficile* spore at equivalent or superior levels to those by 1,000 ppm NaClO.

### Monitoring of FAC after neutralization with sodium thiosulfate

After 1,300 ppm FAC each of NaClO and WACAW was partial neutralized with 0.1 M sodium thiosulfate, their FAC levels were monitored periodically over 5 days. The 336  $\mu$ l and 42  $\mu$ l of 0.1 M sodium thiosulfate were calculated to neutralize a half of FAC of 1,300 ppm WACAW

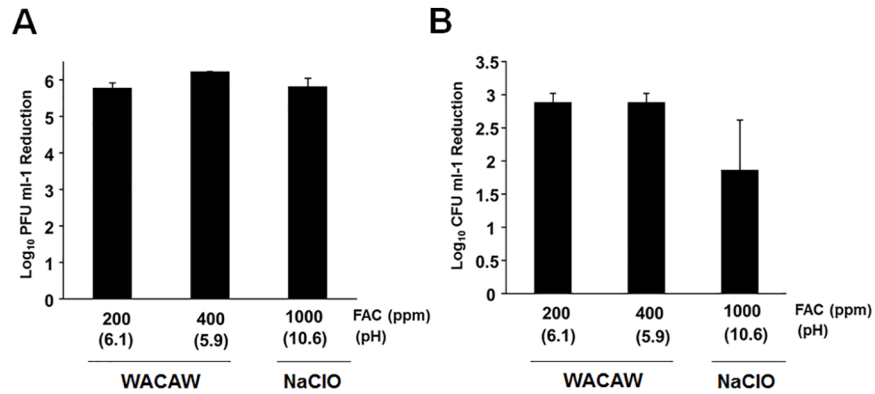

**Fig 6. Inactivation of FCV (A) and *C. difficile* spore (B) in the presence of rat cecal content.** The sporocidal activity against *C. difficile* 630 spores was examined in reaction mixtures containing 0.5% (w/v) rat cecal content. The remaining viable *C. difficile* spores after treatment with the test sanitizers for the indicated times were quantified using a standard plate assay with BHIS supplemented with taurocholic acid. Data are expressed as means ± standard deviations obtained from three independent experiments. No significant difference was found.

<https://doi.org/10.1371/journal.pone.0176718.g006>

and NaClO, respectively. As shown in Fig 7, the FAC level of WACAW (1 ml) immediately decreased to 820 ppm when 336 μl of 0.1 M sodium thiosulfate was added. Interestingly, the FAC level of partially neutralized WACAW was restored to its initial level within 24 h after neutralization. In contrast, the FAC level of the NaClO (1 ml) was rapidly decreased to around 10 ppm when 42 μl of 0.1 M sodium thiosulfate was added, and its FAC level did not recover during the observation period.

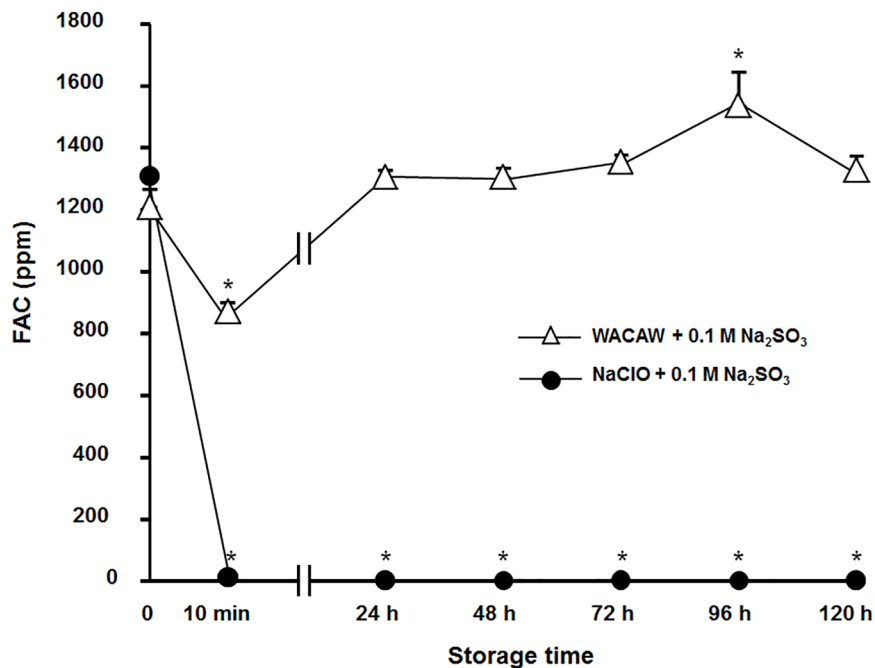

**Fig 7. Monitoring of FAC after neutralization with sodium thiosulfate.** After WACAW and NaClO, adjusted to FAC levels of 1,300 ppm, were partially neutralized with 0.1 mM sodium thiosulfate (Na<sub>2</sub>SO<sub>3</sub>), the change of the FAC levels were monitored at the indicated time points by the *N,N*-diethyl-*p*-phenylenediamine sulfate method. The means and standard deviations of three experiments are shown. Significant differences from the initial FAC level were expressed by \* ( $p < 0.01$ ).

<https://doi.org/10.1371/journal.pone.0176718.g007>

**Table 1. Changes of TC, FAC and combined chlorine levels in the test sanitizers after contact with BSA.**

| Sanitizers (setting TC) | TC          |              | FAC           |          | CMC         |              |
|-------------------------|-------------|--------------|---------------|----------|-------------|--------------|
|                         | Before      | After        | Before        | After    | Before      | After        |
| WACAW (2,000 ppm TC)    | 1921.2±48.4 | 1677.9±80.8  | 108.11±1.8    | 0.7±0.2  | 1813.1±47.0 | 1677.2±80.6  |
| WACAW (4,000 ppm TC)    | 3671.1±12.1 | 3215.5±93.7  | 228.68±12.1   | 20.6±2.6 | 3442.5±12.1 | 3194.9±93.7  |
| NaClO (2,000 ppm TC)    | 2002.0±20.7 | 1088.7±88.2  | 2091.67±108.2 | 13.6±0.8 | <0.00       | 1075.0±88.3  |
| NaClO (4,000 ppm TC)    | 3913.9±50.5 | 1507.1±126.2 | 4391.08±99.5  | 24.3±0.7 | <0.00       | 1482.8±126.2 |

Abbreviation: TC, total chlorine; FAC, free available chlorine, CMC, combined chlorine.

<https://doi.org/10.1371/journal.pone.0176718.t001>

### Monitoring of combined chlorine (CMC) level after contact with BSA

Chlorine-based sanitizers often generate chlorinated substances such as chloramines (e.g. NH<sub>2</sub>Cl). These combined form of chlorine are less reactive and quantified as combined chlorines (CMC). As shown in Table 1, a large amount of chlorine atom in WACAW was detected as CMC due to the high content of ClO<sub>2</sub><sup>-</sup>. On the other hand, the chlorine atoms in NaClO were all reactive FAC. After 2,000 or 4,000 ppm TC of the test sanitizer (WACAW or NaClO) was exposed to 0.5% BSA for 10 min, the changes in TC, FAC and CMC levels were monitored. The TC levels of NaClO was decreased by 46–61% while those of WACAW remained 87–88%. The FAC of WACAW (4,000 ppm TC) or NaClO (4,000 ppm TC) decreased to 9.0% and 0.05%, respectively. Interestingly, the CMC levels were markedly increased in NaClO after contact with BSA while no increase in CMC was observed in WACAW. These results indicate that WACAW does not chlorinate the target substances while NaClO produces a large amount of chlorinated substances after contact with organic matters.

### Discussion

NaClO is a highly reactive, chlorine-based disinfectant that shows a wide antimicrobial spectrum that includes bacterial spores and non-enveloped viruses. Since *C. difficile* spore and FCV, a human norovirus surrogate, are resistant to the commonly used disinfectants, environmental sanitation with NaClO is applied to block the transmission of these pathogens [33, 34]. Park et al. reported that alcohol (67–79%, pH4.1–7.4) achieved less than 1.0 log<sub>10</sub> reduction in FCV F9 strain [35]. In addition, Lawrey et al. demonstrated that 70% ethanol has no sporicidal activity against *C. difficile* 630 spore [36]. In this study, WACAW with >5 and >50 ppm FAC showed >5.0 log<sub>10</sub> and >3.0 log<sub>10</sub> reduction in FCV F9 and *C. difficile* 630 spore, respectively, in the absence of organic substances. These results indicate that WACAW is an effective sanitizer to control the outbreak of norovirus and *C. difficile* infections.

In the practice of disinfection of environmental surfaces contaminated with human vomit or stool, one must consider that disinfectants rapidly lose its antimicrobial activity in contact with organic matter. Indeed, it has been reported that 10,000 ppm NaClO failed to inactivate *Staphylococcus aureus* in human blood [37]. WACAW was also required higher FAC or longer treatment to inactivate the FCV and *C. difficile* spore in the presence of BSA, polypeptone or meat extract (Figs 2–5). However, WACAW inactivated FCV and *C. difficile* spore at much lower FAC level than NaClO in the presence of organic materials. In addition, WACAW (4,000 ppm TC) retained 9.0% of the initial FAC after 10-min contact with 0.5% BSA while the FAC of NaClO (4,000 ppm TC) decreased to 0.05% (Table 1). These results indicate that WACAW is more stable than NaClO under organic matter-rich condition.

ASC has been reported to be relatively stable and have a bactericidal effect on foods superior to NaClO under organic matter-rich conditions, such as elimination of *Salmonella* or

pathogenic *Escherichia coli* from vegetables or meat [20, 25]. Therefore, ASC is now widely used for sanitation of foods and environmental surfaces. ASC (pH 2.3–2.9) is prepared with sodium chlorite ( $\text{NaClO}_2$ ) and strongly acidified with acids generally recognized as safe, such as citrate or lactate. ASC rapidly produces a large amount of chlorous acid ( $\text{HClO}_2$ ) that converts to  $\text{ClO}_2$  gas (released into the air) under strongly acidic conditions [28]. Therefore, its bactericidal activity is short-lived, and ASC must be prepared at the time of use. We have recently reported that WACAW not only retains its microbicidal activity but is also stable under organic matter-rich conditions [26]. Since the microbicidal effect of WACAW is dependent on the oxidative potential of  $\text{HClO}_2$  and  $\text{ClO}_2$  [28], the killing mechanisms of ASC and WACAW are thought to be similar. However, the spectrophotometric pattern of WACAW seemed to be stable while  $\text{ClO}_2$  became dominant in ASC time-dependently. The relative tolerance of WACAW to organic matter might be derived from the stability of its chemical composition.

In this study, we tested three kinds of proteinaceous compounds including BSA, polypeptone and meat extract, which simulate blood, vomit and feces, to evaluate the stability of test sanitizers. The results showed that the effect on microbicidal activity of WACAW and  $\text{NaClO}$  was markedly different among the compounds. Polypeptone and meat extract inhibited the microbicidal activity of WACAW and  $\text{NaClO}$  to FCV and *C. difficile* spores to a greater extent than BSA. Although BSA is widely used to evaluate the stability under organic matter-rich conditions, our results indicate that the disinfection efficacy of sanitizers must be examined under various organic matter loads.

Interestingly, different modes of interference on the microbicidal activities of WACAW and  $\text{NaClO}$  were observed among BSA, polypeptone and meat extract. Measurement of the protein concentrations of 0.5% polypeptone (w/v) ( $1.12 \text{ mg ml}^{-1}$ ) and 0.5% meat extract (w/v) ( $1.03 \text{ mg ml}^{-1}$ ) indicates that they contain many organic substances other than proteins. Interestingly, WACAW and  $\text{NaClO}$  showed different responses to these organic substances. The virucidal activity of  $\text{NaClO}$  was more affected by meat extract than polypeptone, while the activity of WACAW was more strongly decreased by polypeptone than BSA and meat extract, indicating that the reaction selectivity of WACAW and  $\text{NaClO}$  is different. In fact, Ingram *et al.* reported that  $\text{HClO}_2$ -based sanitizers preferentially react with sulfhydryl groups [22, 38]. However, at present, it is unknown which chemical composition in polypeptone is involved in the inhibition of the virucidal activity of WACAW. Identification of preferential active groups for WACAW might lead to the discovery of antimicrobial agents that selectively react with FCV capsid proteins and *C. difficile* spore coat proteins but do not react with organic matter in human excretions.

Although how WACAW could retain its microbicidal activity was unclear, we hypothesize that this stability came from the large dissociation of total chlorine level and FAC level in WACAW (the total chlorine level is nearly 10-fold higher than FAC). WACAW mainly contains three kinds of oxygenated chlorines:  $\text{HClO}_2$ ,  $\text{ClO}_2^-$  and  $\text{ClO}_2$ . Of these,  $\text{ClO}_2^-$  shows weak oxidative potential, making only a minor contribution to FAC level or antimicrobial killing. Therefore,  $\text{ClO}_2^-$  content is considered to be much higher than  $\text{HClO}_2$  and  $\text{ClO}_2$  in WACAW. This  $\text{ClO}_2^-$  might continuously supply  $\text{HClO}_2$  under acidic conditions even after FAC is consumed from contact with microorganisms or organic matter. As shown in Fig 7, FAC decreased immediately after neutralization of  $\text{NaClO}$  and WACAW with sodium thiosulfate. However, in the case of WACAW, FAC was restored to the original level until 24 h after neutralization; such recovery was not observed for  $\text{NaClO}$ .

The data shown in Table 1 clearly demonstrated the difference in oxidation mechanism of WACAW and  $\text{NaClO}$ , where the CMC increased after  $\text{NaClO}$  being exposed to BSA while the CMC level did not increase in WACAW.  $\text{NaClO}$  chlorinated organic substances but WACAW

probably does not. NaClO is known to produce mutagenic compounds such as trihalomethane during oxidation of organic substances [39, 40]. From the viewpoint of food safety, the finding indicates that WACAW might be a suitable sanitizer in food industries.

## Conclusions

WACAW exhibited microbicidal activity superior to NaClO against FCV and *C. difficile* spores even in the presence of BSA (0.5% or 5.0%, w/v) or 0.5% (w/v) each of polypeptone or meat extract. WACAW may be a useful sanitizer to inactivate the non-enveloped viruses or bacterial spores present in foods and on environmental surfaces contaminated with human excretions.

## Acknowledgments

We thank Dr. Katayama (National Institute of Infectious Diseases, Japan) for his kind gift of the CRFK cell line.

## Author Contributions

**Conceptualization:** HG HNI YF TK.

**Funding acquisition:** HG TK.

**Investigation:** HG HY HNI HK IH TN A. Tada.

**Methodology:** HY IH HK.

**Project administration:** HG TK.

**Resources:** HG HK.

**Supervision:** HG YF A. Tada TK.

**Visualization:** HY HNI HK.

**Writing – original draft:** HG TK.

**Writing – review & editing:** A. Terada.

## References

1. Todd EC, Greig JD, Bartleson CA, Michaels BS. Outbreaks where food workers have been implicated in the spread of foodborne disease. Part 5. Source of contamination and pathogen excretion from infected persons. *J Food Prot.* 2008; 71:2582–2595. PMID: [19244919](https://pubmed.ncbi.nlm.nih.gov/19244919/)
2. Okabayashi T, Yokota S, Ohkoshi Y, Ohuchi H, Yoshida Y, Kikuchi M et al. Occurrence of norovirus infections unrelated to norovirus outbreaks in an asymptomatic food handler population. *J Clin Microbiol.* 2008; 46:1985–1988. <https://doi.org/10.1128/JCM.00305-08> PMID: [18434560](https://pubmed.ncbi.nlm.nih.gov/18434560/)
3. Kramer A, Schwebke I, Kampf G. How long do nosocomial pathogens persist on inanimate surfaces? A systematic review. *BMC Infect Dis.* 2006; 6:130. <https://doi.org/10.1186/1471-2334-6-130> PMID: [16914034](https://pubmed.ncbi.nlm.nih.gov/16914034/)
4. Weber DJ, Rutala WA, Miller MB, Huslage K, Sickbert-Bennett E. Role of hospital surfaces in the transmission of emerging health care-associated pathogens: norovirus, *Clostridium difficile*, and *Acinetobacter* species. *Am J Infect Control.* 2010; 38 Suppl 1:25–33.
5. Otter JA, Yezli S, French GL. The role played by contaminated surfaces in the transmission of nosocomial pathogens. *Infect Control Hosp Epidemiol.* 2011; 32:687–699. <https://doi.org/10.1086/660363> PMID: [21666400](https://pubmed.ncbi.nlm.nih.gov/21666400/)
6. Center for Disease Control and Prevention. Guideline for Hand Hygiene in Healthcare Settings: Recommendations of the Healthcare Infection Control Practices Advisory Committee and the HIPAC/SHEA/APIC/IDSA Hand Hygiene Task Force. *MMWR.* 2002; 51 (RR-16):1–44. PMID: [12418624](https://pubmed.ncbi.nlm.nih.gov/12418624/)

7. Sehulster L, Chinn RY, Center for Disease Control and Prevention, Healthcare Infection Control Practices Advisory Committee. Guidelines for environmental control in health-care facilities. Recommendations of CDC and the Healthcare Infection Control Practices Advisory Committee (HICPAC). *MMWR Recomm Rep*. 2003; 52 (RR-10): 1–42. PMID: [12836624](#)
8. Barker J, Vipond IB, Bloomfield SF. Effects of cleaning and disinfection in reducing the spread of norovirus contamination via environmental surfaces. *J Hosp Infect*. 2004; 58:42–49. <https://doi.org/10.1016/j.jhin.2004.04.021> PMID: [15350713](#)
9. Kampf G, Kramer A. Epidemiologic background of hand hygiene and evaluation of the most important agents for scrubs and rubs. *Clin Microbiol Rev*. 2004; 17:863–893. <https://doi.org/10.1128/CMR.17.4.863-893.2004> PMID: [15489352](#)
10. Dancer SJ. The role of environmental cleaning in the control of hospital-acquired infection. *J Hosp Infect*. 2009; 273:378–385.
11. Liu P, Yuen Y, Hsiao HM, Jaykus LA, Moe C. Effectiveness of liquid soap and hand sanitizer against Norwalk virus on contaminated hands. *Appl Environ Microbiol*. 2010; 76:394–399. <https://doi.org/10.1128/AEM.01729-09> PMID: [19933337](#)
12. Ling ML, Apisarnthanarak A, Thu le TA, Villanueva V, Pandjaitan C, Yusof MY. APSIC Guidelines for environmental cleaning and decontamination. *Antimicrob Resist Infect Control*. 2015; 4:58. <https://doi.org/10.1186/s13756-015-0099-7> PMID: [26719796](#)
13. Evans MR, Meldrum R, Lane W, Gardner D, Ribeiro CD, Gallimore CI, et al. An outbreak of viral gastroenteritis following environmental contamination at a concert hall. *Epidemiol Infect*. 2002; 129:355–360. PMID: [12403111](#)
14. Verani M, Bigazzi R, Carducci A. Viral contamination of aerosol and surfaces through toilet use in health care and other settings. *Am J Infect Control*. 2014; 42:758–762. <https://doi.org/10.1016/j.ajic.2014.03.026> PMID: [24818773](#)
15. Siegel JD, Rhinehart E, Jackson M, Chiarella L, Health Care Infection Control Practices Advisory Committee. Guideline for isolation precautions: preventing transmission of infectious agents in healthcare settings. *Am J Infect Control*. 2007; 10 Suppl 2:65–164.
16. Dubberke ER, Carling P, Carrico R, Donskey CJ, Loo VG, McDonald LC, et al. Strategies to prevent *Clostridium difficile* infections in acute care hospitals: 2014 update. *Infect Control Hosp Epidemiol*. 2014; 35 Suppl 2:48–65.
17. Haas CN, Engelbrecht RS. Physiological alterations of vegetative microorganisms resulting from chlorination. *J Water Pollut Control Fed*. 1980; 52:1976–1989. PMID: [6995623](#)
18. Young SB, Setlow P. Mechanisms of killing of *Bacillus subtilis* spores by hypochlorite and chlorine dioxide. *J Appl Microbiol*. 2003; 95:54–67. PMID: [12807454](#)
19. Van Aken B, Lin LS. Effect of the disinfection agents chlorine, UV irradiation, silver ions, and TiO<sub>2</sub> nanoparticles/near-UV on DNA molecules. *Water Sci Technol*. 2011; 64:1226–1232. PMID: [22214074](#)
20. Butterfield CT. Bactericidal properties of free and combined available chlorine. *Journal (American Water Works Association)*. 1948; 40:1305–1312.
21. Ridenour GM, Ingols RS. Inactivation of poliomyelitis virus by “free” chlorine. *Am J Public Health* 1946; 36:639–644.
22. Ingram PR, Pitt AR, Wilson CG, Olejnik O, Spickett CM. A comparison of the effects of ocular preservatives on mammalian and microbial ATP and glutathione levels. *Free Radic Res*. 2004; 38:739–750. PMID: [15453639](#)
23. Gastillo A, Lucia LM, Kemp GK, Acuff GR. Reduction of *Escherichia coli* O157:H7 and *Salmonella typhimurium* on beef carcass surfaces using acidified sodium chlorite. *J Food Prot*. 1999; 62:580–584. PMID: [10382644](#)
24. Kumar M, Hora R, Kostrzynska M, Waites WM, Warriner K. Inactivation of *Escherichia coli* O157:H7 and *Salmonella* on mung beans, alfalfa, and other seed types destined for sprout production by using an oxychloro-based sanitizer. *J Food Prot*. 2006; 69:1571–1578. PMID: [16865888](#)
25. Stopforth JD, Mai T, Kottapalli B, Samadpour M. Effect of acidified sodium chlorite, chlorine, and acidic electrolyzed water on *Escherichia coli* O157:H7, *Salmonella*, and *Listeria monocytogenes* inoculated onto leafy greens. *J Food Prot*. 2008; 71:625–628. PMID: [18389712](#)
26. Horiuchi I, Kawata H, Nagao T, Imaohji H, Murakami K, Kino Y, et al. Antimicrobial activity and stability of weakly acidified chlorous acid water. *Biocontrol Sci*. 2015; 20:43–51. <https://doi.org/10.4265/bio.20.43> PMID: [25817812](#)
27. Yamaoka H, Nakayama-Imaohji H., Horiuchi I, Yamasaki H, Nagao T, Fujita Y, et al. Tetramethylbenzidine methods for monitoring the free available chlorine and microbicidal activity of chlorite-based sanitizers under organic-matter-rich environments. *Lett Appl Microbiol*. 2016; 62:47–54. <https://doi.org/10.1111/lam.12506> PMID: [26460606](#)

28. Gordon G, Kieffer RG, Rosenblatt DH. The chemistry of chlorine dioxide. In: Lippard SJ, editor. Progress in inorganic chemistry. New York: John Wiley & Sons;1972. pp. 201–286.
29. Gagnon GA, Rand JL, O'leary KC, Rygel AC, Chauret C, Andrews RC. Disinfection efficacy of chlorite and chlorine dioxide in drinking water biofilms. *Water Res.* 2005; 39:1809–1817. <https://doi.org/10.1016/j.watres.2005.02.004> PMID: 15899279
30. Moberg L, Karlberg B. An improved *N,N'*-diethyl-*p*-phenylenediamine (DPD) method for the determination of free chlorine based on multiple wavelength detection. *Analytical Chimica Acta.* 2000; 29:123–33.
31. Ministry of Health, Labor, and Welfare Japan. Chlorous Acid Water. Notification No.15 from the Ministry of Health, Labor, and Welfare Japan, released on February, 2013. [http://kanpou.npb.go.jp/20130201\\_01d/20130201g00020/20130201g000200000f.html](http://kanpou.npb.go.jp/20130201_01d/20130201g00020/20130201g000200000f.html). Accessed 22 Feb 2017.
32. Japan Food Hygiene Association. Test for Virus Inactivation. In: Standard Methods of Analysis in Food Safety and Regulation. Tokyo: Japan Food Hygiene Association, 2015.
33. MacCannell T, Umscheid CA, Agarwal RK, Lee I, Kuntz G, Stevenson KB, et al. Guideline for the prevention and control of norovirus gastroenteritis outbreaks in healthcare settings. 2011. <http://www.cdc.gov/hicpac/pdf/norovirus/Norovirus-Guideline-2011.pdf>. Accessed 3 Dec 2016.
34. Cohen SH, Gerding DN, Johnson S, Ciaran PK, Loo VG, McDonald LC, et al. Clinical Practice Guidelines for *Clostridium difficile* Infection in Adults: 2010 Update by the Society for Healthcare Epidemiology of America (SHEA) and the Infectious Diseases Society of America (IDSA). *Infect Control Hosp Epidemiol.* 2013; 31: 423–455.
35. Park GW, Barclay L, Macinga D, Charbonneau D, Pettigrew CA, Vinje J. Comparative efficacy of seven hand sanitizers against murine norovirus, feline calicivirus, and GII.4 norovirus. *J Food Prot.* 2010; 73:2232–2238. PMID: 21219741
36. Lawley TD, Croucher NJ, Yu L, Clare S, Sebahia M, Goulding D, et al. Proteomic and genomic characterization of highly infectious *Clostridium difficile* 630 spores. *J Bacteriol.* 2009; 191:5377–5386. <https://doi.org/10.1128/JB.00597-09> PMID: 19542279
37. Chitnis V, Chitnis S, Patil S, Chitnis D. Practical limitations of disinfection of body fluid spills with 10,000 ppm sodium hypochlorite (NaOCl). *Am J Infect Control.* 2014; 32:306–308.
38. Ingram PR, Homer NZM, Smith RA, Pitt AR, Wilson CG, Olejnik O, et al. The interaction of sodium chlorite with phospholipids and glutathione: a comparison of effects in vitro, in mammalian and in microbial cells. *Arch Biochem Biophys.* 2003; 410:121–133. PMID: 12559984
39. Richardson SD, Thurston AD, Caughran TV, Collette TW, Patterson KS, Lykins BW. Chemical by-products of chlorine and alternative disinfectants. *Food Technol.* 1998; 52:58–61.
40. Richardson SD. Drinking water disinfection by-product. In: Meyers RA, editor. *The Encyclopedia of Environmental Analysis and Remediation.* New York: John Wiley & Sons; 1998. pp.1398–1421.
